# Supplementary material for: Structure–composition trends in multicomponent borosilicate-based glasses deduced from molecular dynamics simulations with improved B–O and P–O force fields
Source: Royal Society of Chemistry journal article supplement (doi:10.1039/c7cp08593a), 2018-01-01
Supplement: c7cp08593a1.pdf [file c7cp08593a1.pdf]

# Electronic Supplementary Information for Structure-Composition Trends in Multicomponent Borosilicate-Based Glasses Deduced from Molecular Dynamics Simulations with Improved B–O and P–O Force Fields

Baltzar Stevansson, Yang Yu, and Mattias Edén\*

Physical Chemistry Division, Department of Materials and Environmental Chemistry,  
Stockholm University, SE-106 91 Stockholm, Sweden

\*Corresponding author. E-mail: *mattias.eden@mmk.su.se*

## Contents

1. **Section S1.** Force-Field Validations on Crystalline Structures
2. **Table S1.** MD Simulation Parameters
3. **Table S2.** Optimized Cell Parameters of P/B-Bearing Structures
4. **Table S3.** Average  $F-O-F'$  Bond Angles
5. **Table S4.** Distribution of  $\text{Na}^{[p]}$  and  $\text{Ca}^{[p]}$  Coordinations
6. **Figure S1.** Cooling-Rate Dependence
7. **Figure S2.** Intrapolyhedral Bond-Angle Distributions
8. **Figure S3.** Na–O and Ca–O Pair Distribution Functions
9. **References**

## S1 Force Field Validations on Crystalline Structures

The P–O and B–O force fields were evaluated by *NPT* energy minimizations at 0 K in vacuum by utilizing the GULP program<sup>S1</sup> to a set of P and/or B based crystalline structures, with the interatomic potentials evaluated out to 0.8 nm. The space-group symmetry was preserved throughout. Table **S2** contrasts the resulting lattice parameters  $\{a, b, c\}$ , and unit cell volume ( $V$ ) with their experimental counterparts obtained by X-ray diffraction (XRD). An acceptable agreement is observed, with the calculated volumes generally staying within 95% and 92% of the experimental counterparts for the phosphates and borates, respectively, whereas similar errors resulted for the  $\{a, b, c\}$  parameters. The  $B_2O_3$  calculation manifests the overall largest deviation of  $\approx 11\%$  in the cell volume and 3–4% of the lattice parameters.

We are not aware of similar evaluations of B–O force fields on crystalline structures and the present results may therefore be viewed as benchmark values for future comparisons. Yet, we note that our P–O potential assessments on crystalline phosphates provide comparable deviations as those obtained by the shell-model-based P–O force field recently introduced by Ainsworth et al.,<sup>S2</sup> which was developed specifically for MD simulations of Na/Ca-bearing phosphate glasses. Further validations are discussed in the main article in the context of the B/P-bearing multicomponent glasses listed in Table **1**.

**Table S1: MD Simulation Parameters<sup>a</sup>**

| Glass            | Oxide Equivalents (mol%) |      |                               |                  |                               | Number of Atoms  |                 |                 |                |                 |                |                | $N_{\text{sim}}$ | $a$ (nm) <sup>b</sup> | $\rho$ (g cm <sup>-3</sup> ) <sup>c</sup> | Ref.            |
|------------------|--------------------------|------|-------------------------------|------------------|-------------------------------|------------------|-----------------|-----------------|----------------|-----------------|----------------|----------------|------------------|-----------------------|-------------------------------------------|-----------------|
|                  | Na <sub>2</sub> O        | CaO  | B <sub>2</sub> O <sub>3</sub> | SiO <sub>2</sub> | P <sub>2</sub> O <sub>5</sub> | $N_{\text{tot}}$ | $N_{\text{Na}}$ | $N_{\text{Ca}}$ | $N_{\text{B}}$ | $N_{\text{Si}}$ | $N_{\text{P}}$ | $N_{\text{O}}$ |                  |                       |                                           |                 |
| NB0.11           | 10.0                     |      | 90.0                          |                  |                               | 3504             | 146             |                 | 1314           |                 |                | 2044           | 3                | 3.446                 | 2.040                                     | S3              |
| NB0.20           | 17.0                     |      | 83.0                          |                  |                               | 3495             | 255             |                 | 1245           |                 |                | 1995           | 3                | 3.413                 | 2.140                                     | S3              |
| NB0.25           | 20.0                     |      | 80.0                          |                  |                               | 3519             | 306             |                 | 1224           |                 |                | 1989           | 3                | 3.394                 | 2.213                                     | S4              |
| NB0.50           | 33.3                     |      | 66.7                          |                  |                               | 3510             | 540             |                 | 1080           |                 |                | 1890           | 3                | 3.364                 | 2.370                                     | S3              |
| NB0.67           | 40.0                     |      | 60.0                          |                  |                               | 3507             | 668             |                 | 1002           |                 |                | 1837           | 3                | 3.385                 | 2.380                                     | S3              |
| NB1.00           | 50.0                     |      | 50.0                          |                  |                               | 3500             | 875             |                 | 875            |                 |                | 1750           | 3                | 3.431                 | 2.367                                     | S3              |
| NB1.30           | 56.5                     |      | 43.5                          |                  |                               | 3560             | 1040            |                 | 800            |                 |                | 1720           | 4                | 3.469                 | 2.390                                     | S3 <sup>d</sup> |
| NBS2-0.25(33)    | 7.7                      |      | 30.8                          | 61.5             |                               | 3478             | 148             |                 | 592            | 592             |                | 2146           | 3                | 3.600                 | 2.192                                     | S5              |
| NBS2-0.5(33)     | 14.3                     |      | 28.6                          | 57.1             |                               | 6000             | 480             |                 | 960            | 960             |                | 3600           | 3                | 4.188                 | 2.396                                     | S6              |
| NBS2-0.75(33)    | 20.0                     |      | 26.7                          | 53.3             |                               | 3498             | 396             |                 | 528            | 528             |                | 2046           | 3                | 3.460                 | 2.501                                     | S7 <sup>d</sup> |
| NBS2-2.5(33)     | 45.4                     |      | 18.2                          | 36.4             |                               | 3515             | 950             |                 | 380            | 380             |                | 1805           | 3                | 3.517                 | 2.499                                     | S7 <sup>d</sup> |
| NBS0.5-0.5(67)   | 25.0                     |      | 50.0                          | 25.0             |                               | 3504             | 438             |                 | 876            | 219             |                | 1971           | 3                | 3.401                 | 2.416                                     | S8              |
| NBS5.10-1.31(16) | 17.7                     |      | 13.5                          | 68.8             |                               | 3270             | 354             |                 | 270            | 688             |                | 1958           | 4                | 3.446                 | 2.503                                     | S9              |
| NBS4-4(20)       | 44.5                     |      | 11.0                          | 44.5             |                               | 3509             | 968             |                 | 242            | 484             |                | 1815           | 4                | 3.548                 | 2.510                                     | S7 <sup>d</sup> |
| NCBPS(0)         | 24.1                     | 23.3 |                               | 48.6             | 4.0                           | 5855             | 966             | 465             |                | 972             | 160            | 3292           | 3                | 4.287                 | 2.650                                     | S10             |
| NCBPS(10)        | 24.1                     | 23.3 | 4.9                           | 43.7             | 4.0                           | 6049             | 966             | 465             | 194            | 875             | 160            | 3389           | 2                | 4.298                 | 2.649                                     | S11             |
| NCBPS(20)        | 24.1                     | 23.3 | 9.7                           | 38.9             | 4.0                           | 6243             | 966             | 465             | 388            | 778             | 160            | 3486           | 2                | 4.308                 | 2.648                                     | S11             |
| NCBPS(30)        | 24.1                     | 23.3 | 14.6                          | 34.0             | 4.0                           | 6439             | 966             | 465             | 584            | 680             | 160            | 3584           | 2                | 4.321                 | 2.645                                     | S11             |
| NCBPS(50)        | 24.1                     | 23.3 | 24.3                          | 24.3             | 4.0                           | 6827             | 966             | 465             | 972            | 486             | 160            | 3778           | 2                | 4.357                 | 2.616                                     | S11             |
| NCBPS(80)        | 24.1                     | 23.3 | 38.9                          | 9.7              | 4.0                           | 7411             | 966             | 465             | 1556           | 194             | 160            | 4070           | 2                | 4.415                 | 2.570                                     | S11             |
| NCPS[2.11]       | 24.6                     | 26.7 |                               | 46.1             | 2.6                           | 5674             | 984             | 534             |                | 922             | 104            | 3130           | 2                | 4.230                 | 2.704                                     | S10             |
| NCPS[2.30]       | 24.2                     | 26.4 |                               | 45.4             | 4.0                           | 5792             | 968             | 528             |                | 908             | 160            | 3228           | 4                | 4.256                 | 2.704                                     | S10             |
| NCPS[2.54]       | 24.1                     | 23.3 |                               | 48.6             | 4.0                           | 5855             | 966             | 465             |                | 972             | 160            | 3292           | 3                | 4.287                 | 2.650                                     | S10             |
| NCPS[2.74]       | 20.2                     | 22.2 |                               | 55.0             | 2.6                           | 5887             | 824             | 454             |                | 1124            | 106            | 3379           | 4                | 4.296                 | 2.640                                     | S10             |
| NCPS[2.93]       | 17.9                     | 23.3 |                               | 54.8             | 4.0                           | 6372             | 776             | 508             |                | 1192            | 176            | 3720           | 2                | 4.414                 | 2.639                                     | S10             |

<sup>a</sup> $N_{\text{tot}}$  represents the total number of atoms in the simulation of one glass model, with  $\{N_{\text{Na}}, N_{\text{Ca}}, N_{\text{B}}, N_{\text{Si}}, N_{\text{P}}, N_{\text{O}}\}$  corresponding to those of {Na, Ca, B, Si, P, O}, respectively, while  $N_{\text{sim}}$  is the number of independent glass models generated.

<sup>b</sup>Side length of the cubic box.

<sup>c</sup>Experimental density, obtained from the as-indicated source.

<sup>d</sup>The experimental density is not available for the precise glass composition:  $\rho$  was estimated by interpolating between values reported for neighboring compositions.

**Table S2: Optimized Cell Parameters of P/B-Bearing Structures<sup>a</sup>**

|                                                    | Space group                   | $V$ (nm <sup>3</sup> ) <sup>b</sup> | $a/b/c$ (pm) <sup>c</sup> | $\epsilon_a/\epsilon_b/\epsilon_c$ (%) <sup>d</sup> | Ref.             |
|----------------------------------------------------|-------------------------------|-------------------------------------|---------------------------|-----------------------------------------------------|------------------|
| <b>Phosphates</b>                                  |                               |                                     |                           |                                                     |                  |
| <b>Na<sub>3</sub>PO<sub>4</sub></b>                | <i>P4<sub>2</sub>1c</i>       |                                     |                           |                                                     |                  |
| exp                                                |                               | 0.7969                              | 1081.1/1081.1/ 681.8      |                                                     | S12 <sup>e</sup> |
| calc                                               |                               | 0.7793(-2.2%)                       | 1075.8/1075.8/ 673.4      | -0.5/-0.5/-1.2                                      |                  |
| <b>NaCaPO<sub>4</sub></b>                          | <i>Pna2<sub>1</sub></i>       |                                     |                           |                                                     |                  |
| exp                                                |                               | 1.0113                              | 2039.7/ 916.1/ 541.2      |                                                     | S13              |
| calc                                               |                               | 1.0620(+5.0%)                       | 2179.8/ 927.1/ 525.5      | +6.9/+1.2/-2.9                                      |                  |
| <b>Na<sub>2</sub>CaP<sub>2</sub>O<sub>7</sub></b>  | <i>P<math>\bar{1}</math></i>  |                                     |                           |                                                     |                  |
| exp                                                |                               | 0.3083                              | 536.1/ 702.9/ 874.3       |                                                     | S14              |
| calc <sup>f</sup>                                  |                               | 0.3142(+1.9%)                       | 543.2/ 704.2/ 871.0       | +1.3/+0.2/-0.4                                      |                  |
| <b>SiP<sub>2</sub>O<sub>7</sub></b>                | <i>P6<sub>3</sub></i>         |                                     |                           |                                                     |                  |
| exp                                                |                               | 0.2295                              | 471.6/ 471.6/1191.7       |                                                     | S15 <sup>g</sup> |
| calc                                               |                               | 0.2321(+1.1%)                       | 478.9/ 478.9/1168.6       | +1.5/+1.5/-1.9                                      |                  |
| <b>Borates/Borosilicates</b>                       |                               |                                     |                           |                                                     |                  |
| <b>B<sub>2</sub>O<sub>3</sub></b>                  | <i>P3<sub>1</sub></i>         |                                     |                           |                                                     |                  |
| exp                                                |                               | 0.1358                              | 433.6/ 433.6/ 834.0       |                                                     | S16              |
| calc                                               |                               | 0.1211(-10.8%)                      | 416.3/ 416.3/ 806.8       | -4.0/-4.0/-3.3                                      |                  |
| <b>NaBO<sub>2</sub></b>                            | <i>R<math>\bar{3}c</math></i> |                                     |                           |                                                     |                  |
| exp                                                |                               | 0.7930                              | 1192.5/1192.5/ 643.9      |                                                     | S17              |
| calc                                               |                               | 0.7620(-3.9%)                       | 1182.3/1182.3/ 629.5      | -0.9/-0.9/-2.2                                      |                  |
| <b>CaB<sub>2</sub>O<sub>4</sub></b>                | <i>Pbcn</i>                   |                                     |                           |                                                     |                  |
| exp                                                |                               | 0.3073                              | 620.5/1158.7/ 427.5       |                                                     | S18              |
| calc                                               |                               | 0.3119(+1.5%)                       | 624.2/1211.5/ 412.5       | +0.6/+4.6/-3.5                                      |                  |
| <b>Ca<sub>3</sub>B<sub>2</sub>O<sub>6</sub></b>    | <i>R<math>\bar{3}c</math></i> |                                     |                           |                                                     |                  |
| exp                                                |                               | 0.7648                              | 863.1/ 863.1/1185.5       |                                                     | S19              |
| calc                                               |                               | 0.8248(+7.8%)                       | 869.7/ 869.7/1259.0       | +0.8/+0.8/+6.2                                      |                  |
| <b>Na<sub>3</sub>CaB<sub>5</sub>O<sub>10</sub></b> | <i>P<math>\bar{1}</math></i>  |                                     |                           |                                                     |                  |
| exp                                                |                               | 0.4404                              | 746.0/ 744.5/1112.4       |                                                     | S20              |
| calc <sup>h</sup>                                  |                               | 0.4403(+0.0%)                       | 752.8/ 738.5/1083.5       | +0.9/-0.8/-2.6                                      |                  |
| <b>NaBSiO<sub>4</sub></b>                          | <i>P6<sub>3</sub></i>         |                                     |                           |                                                     |                  |
| exp                                                |                               | 0.4307                              | 803.5/ 803.5/ 770.3       |                                                     | S21              |
| calc                                               |                               | 0.4059(-5.8%)                       | 788.6/ 788.6/ 753.5       | -1.9/-1.9/-2.2                                      |                  |
| <b>CaB<sub>2</sub>Si<sub>2</sub>O<sub>8</sub></b>  | <i>Pnma</i>                   |                                     |                           |                                                     |                  |
| exp                                                |                               | 0.5438                              | 803.8/ 875.2/ 773.0       |                                                     | S22              |
| calc                                               |                               | 0.5345(-1.7%)                       | 800.9/ 864.1/ 772.4       | -0.4/-1.3/-0.1                                      |                  |
| <b>Borophosphates</b>                              |                               |                                     |                           |                                                     |                  |
| <b>Na<sub>3</sub>BP<sub>2</sub>O<sub>8</sub></b>   | <i>C2/c</i>                   |                                     |                           |                                                     |                  |
| exp                                                |                               | 1.3191                              | 1256.7/1029.0/1021.0      |                                                     | S23              |
| calc <sup>i</sup>                                  |                               | 1.2596(-4.5%)                       | 1209.8/1016.8/1024.0      | -3.7/-1.2/+0.3                                      |                  |
| <b>CaBPO<sub>5</sub></b>                           | <i>P3<sub>1</sub>21</i>       |                                     |                           |                                                     |                  |
| exp                                                |                               | 0.2555                              | 668.0/ 668.0/ 661.2       |                                                     | S24 <sup>g</sup> |
| calc                                               |                               | 0.2512(-1.7%)                       | 659.4/ 659.4/ 667.2       | -1.3/-1.3/+0.9                                      |                  |

<sup>a</sup>Energy minimized lattice parameters obtained by the interatomic potential parameters listed in Table 2. Experimental reference parameters were obtained by single-crystal XRD, unless noted otherwise.

<sup>b</sup>Cell volume, with values within parentheses representing relative deviations (in %) from the experimental value.

<sup>c</sup>{ $a$ ,  $b$ ,  $c$ } unit cell parameters

<sup>d</sup>Relative deviations of the calculated { $a$ ,  $b$ ,  $c$ } parameters (listed in the previous column) relative to the experimental data.

<sup>e</sup>Data obtained from neutron powder diffraction.

<sup>f</sup>The relative error of the unit-cell angles { $\alpha$ ,  $\beta$ ,  $\gamma$ } are {1.8%, 0.6%, 0.1%}.

<sup>g</sup>Data obtained by powder XRD.

<sup>h</sup>The { $\alpha$ ,  $\beta$ ,  $\gamma$ } angles were also optimized, giving relative errors of {0.8%, 2.9%, -2.7%}.

<sup>i</sup>The angle  $\beta$  was optimized, yielding a relative error of -1.95%.

**Table S3: Average  $F-O-F'$  Bond Angles<sup>a</sup>**

| Class            | $x_{\text{NBO}}$ | $x_{\text{B}}^{[4]}$ | Si-O-Si | Si-O-B <sup>[3]</sup> | Si-O-B <sup>[4]</sup> | B <sup>[3]</sup> -O-B <sup>[3]</sup> | B <sup>[3]</sup> -O-B <sup>[4]</sup> | B <sup>[4]</sup> -O-B <sup>[4]</sup> |
|------------------|------------------|----------------------|---------|-----------------------|-----------------------|--------------------------------------|--------------------------------------|--------------------------------------|
| NB0.11           | 0.000            | 0.118                |         |                       |                       | 127.1                                | 126.1                                | 127.4                                |
| NB0.20           | 0.000            | 0.214                |         |                       |                       | 127.1                                | 126.7                                | 128.1                                |
| NB0.25           | 0.007            | 0.331                |         |                       |                       | 127.1                                | 127.0                                | 129.2                                |
| NB0.50           | 0.050            | 0.420                |         |                       |                       | 126.3                                | 126.7                                | 128.4                                |
| NB0.67           | 0.139            | 0.420                |         |                       |                       | 126.1                                | 126.0                                | 128.1                                |
| NB1.00           | 0.337            | 0.331                |         |                       |                       | 125.5                                | 125.9                                | 127.1                                |
| NB1.30           | 0.495            | 0.238                |         |                       |                       | 125.7                                | 126.8                                | 127.5                                |
| NBS2-0.25(33)    | 0.005            | 0.240                | 147.0   | 135.7                 | 132.1                 | 126.4                                | 127.1                                | 130.0                                |
| NBS2-0.50(33)    | 0.020            | 0.433                | 144.8   | 134.8                 | 132.2                 | 126.3                                | 128.1                                | 131.5                                |
| NBS2-0.75(33)    | 0.050            | 0.563                | 143.0   | 133.6                 | 132.3                 | 127.3                                | 126.9                                | 132.2                                |
| NBS2-2.50(33)    | 0.445            | 0.385                | 140.6   | 131.6                 | 131.9                 | 123.7                                | 129.4                                | 135.9                                |
| NBS0.5-0.50(67)  | 0.033            | 0.435                | 145.4   | 133.8                 | 132.8                 | 126.5                                | 127.4                                | 130.9                                |
| NBS5.10-1.31(16) | 0.097            | 0.615                | 142.4   | 132.5                 | 131.4                 | 127.8                                | 127.7                                | 131.6                                |
| NBS4-4.00(20)    | 0.484            | 0.367                | 140.4   | 130.9                 | 132.3                 | 125.0                                | 128.6                                | 133.2                                |
| NCBPS(0)         | 0.625            |                      | 138.5   |                       |                       |                                      |                                      |                                      |
| NCBPS(10)        | 0.584            | 0.403                | 138.5   | 129.8                 | 130.0                 | 124.2                                | 126.7                                | 138.4                                |
| NCBPS(20)        | 0.546            | 0.392                | 139.2   | 130.4                 | 130.0                 | 124.0                                | 127.6                                | 133.3                                |
| NCBPS(30)        | 0.504            | 0.431                | 139.8   | 129.8                 | 130.6                 | 126.8                                | 127.1                                | 129.7                                |
| NCBPS(50)        | 0.438            | 0.420                | 140.1   | 130.6                 | 130.3                 | 124.5                                | 126.1                                | 130.0                                |
| NCBPS(80)        | 0.348            | 0.419                | 141.5   | 132.2                 | 130.5                 | 125.8                                | 125.8                                | 128.7                                |
| NCPS[2.11]       | 0.688            |                      | 137.0   |                       |                       |                                      |                                      |                                      |
| NCPS[2.30]       | 0.677            |                      | 137.4   |                       |                       |                                      |                                      |                                      |
| NCPS[2.54]       | 0.625            |                      | 138.5   |                       |                       |                                      |                                      |                                      |
| NCPS[2.74]       | 0.544            |                      | 138.8   |                       |                       |                                      |                                      |                                      |
| NCPS[2.93]       | 0.529            |                      | 139.4   |                       |                       |                                      |                                      |                                      |
| $\sigma^b$       | 0.001            | 0.007                | 0.3     | 0.4                   | 0.3                   | 1.1                                  | 0.7                                  | 2.0                                  |

<sup>a</sup>Corner-shared average interpolyhedral angles in degrees.

<sup>b</sup>Typical data uncertainties, estimated as the rms deviation from the average parameter value.

**Table S4: Distribution of Na<sup>[p]</sup> and Ca<sup>[p]</sup> Coordinations<sup>a</sup>**

| Glass            | $x_{\text{NBO}}$ | $x_{\text{B}}^{[4]}$ | $\bar{Z}_{\text{Na}}$ | $\sigma_{\text{Na}}(p)$ | $x_{\text{Na}}^{[4]}$ | $x_{\text{Na}}^{[5]}$ | $x_{\text{Na}}^{[6]}$ | $x_{\text{Na}}^{[7]}$ | $x_{\text{Na}}^{[8]}$ | $x_{\text{Na}}^{[9]}$ | $\bar{Z}_{\text{Ca}}$ | $\sigma_{\text{Ca}}(p)$ | $x_{\text{Ca}}^{[4]}$ | $x_{\text{Ca}}^{[5]}$ | $x_{\text{Ca}}^{[6]}$ | $x_{\text{Ca}}^{[7]}$ | $x_{\text{Ca}}^{[8]}$ | $x_{\text{Ca}}^{[9]}$ |  |
|------------------|------------------|----------------------|-----------------------|-------------------------|-----------------------|-----------------------|-----------------------|-----------------------|-----------------------|-----------------------|-----------------------|-------------------------|-----------------------|-----------------------|-----------------------|-----------------------|-----------------------|-----------------------|--|
| NB0.11           | 0.000            | 0.118                | 7.30                  | 1.11                    | 0.003                 | 0.039                 | 0.186                 | 0.355                 | 0.282                 | 0.111                 |                       |                         |                       |                       |                       |                       |                       |                       |  |
| NB0.20           | 0.000            | 0.214                | 7.23                  | 1.13                    | 0.004                 | 0.050                 | 0.200                 | 0.346                 | 0.274                 | 0.107                 |                       |                         |                       |                       |                       |                       |                       |                       |  |
| NB0.25           | 0.007            | 0.331                | 6.99                  | 1.24                    | 0.015                 | 0.094                 | 0.235                 | 0.322                 | 0.229                 | 0.084                 |                       |                         |                       |                       |                       |                       |                       |                       |  |
| NB0.50           | 0.050            | 0.420                | 6.91                  | 1.30                    | 0.024                 | 0.108                 | 0.247                 | 0.298                 | 0.213                 | 0.087                 |                       |                         |                       |                       |                       |                       |                       |                       |  |
| NB0.67           | 0.139            | 0.420                | 6.56                  | 1.29                    | 0.043                 | 0.155                 | 0.291                 | 0.282                 | 0.157                 | 0.056                 |                       |                         |                       |                       |                       |                       |                       |                       |  |
| NB1.00           | 0.337            | 0.331                | 6.14                  | 1.17                    | 0.063                 | 0.234                 | 0.337                 | 0.242                 | 0.094                 | 0.021                 |                       |                         |                       |                       |                       |                       |                       |                       |  |
| NB1.30           | 0.495            | 0.238                | 6.00                  | 1.07                    | 0.056                 | 0.280                 | 0.368                 | 0.213                 | 0.068                 | 0.013                 |                       |                         |                       |                       |                       |                       |                       |                       |  |
| NBS2-0.25(33)    | 0.005            | 0.240                | 6.21                  | 1.28                    | 0.073                 | 0.207                 | 0.317                 | 0.246                 | 0.107                 | 0.034                 |                       |                         |                       |                       |                       |                       |                       |                       |  |
| NBS2-0.50(33)    | 0.020            | 0.433                | 6.42                  | 1.26                    | 0.048                 | 0.179                 | 0.296                 | 0.279                 | 0.142                 | 0.043                 |                       |                         |                       |                       |                       |                       |                       |                       |  |
| NBS2-0.75(33)    | 0.050            | 0.563                | 6.54                  | 1.31                    | 0.047                 | 0.163                 | 0.280                 | 0.282                 | 0.160                 | 0.052                 |                       |                         |                       |                       |                       |                       |                       |                       |  |
| NBS2-2.50(33)    | 0.445            | 0.385                | 5.78                  | 1.06                    | 0.095                 | 0.314                 | 0.354                 | 0.178                 | 0.047                 | 0.007                 |                       |                         |                       |                       |                       |                       |                       |                       |  |
| NBS0.5-0.50(67)  | 0.033            | 0.435                | 6.83                  | 1.27                    | 0.021                 | 0.118                 | 0.270                 | 0.307                 | 0.190                 | 0.074                 |                       |                         |                       |                       |                       |                       |                       |                       |  |
| NBS5.10-1.31(16) | 0.097            | 0.615                | 6.04                  | 1.27                    | 0.092                 | 0.229                 | 0.318                 | 0.221                 | 0.097                 | 0.025                 |                       |                         |                       |                       |                       |                       |                       |                       |  |
| NBS4-4.00(20)    | 0.484            | 0.367                | 5.63                  | 1.00                    | 0.113                 | 0.349                 | 0.355                 | 0.143                 | 0.032                 | 0.003                 |                       |                         |                       |                       |                       |                       |                       |                       |  |
| NCBPS(0)         | 0.625            |                      | 5.84                  | 1.00                    | 0.071                 | 0.299                 | 0.388                 | 0.191                 | 0.043                 | 0.004                 | 5.91                  | 0.83                    | 0.031                 | 0.270                 | 0.482                 | 0.190                 | 0.025                 | 0.001                 |  |
| NCBPS(10)        | 0.584            | 0.403                | 5.95                  | 1.01                    | 0.062                 | 0.261                 | 0.391                 | 0.223                 | 0.053                 | 0.005                 | 6.03                  | 0.84                    | 0.014                 | 0.252                 | 0.470                 | 0.222                 | 0.040                 | 0.002                 |  |
| NCBPS(20)        | 0.546            | 0.392                | 6.09                  | 1.03                    | 0.045                 | 0.241                 | 0.386                 | 0.242                 | 0.074                 | 0.011                 | 6.16                  | 0.90                    | 0.016                 | 0.208                 | 0.445                 | 0.261                 | 0.064                 | 0.005                 |  |
| NCBPS(30)        | 0.504            | 0.431                | 6.24                  | 1.09                    | 0.043                 | 0.203                 | 0.366                 | 0.266                 | 0.100                 | 0.019                 | 6.19                  | 0.92                    | 0.016                 | 0.206                 | 0.436                 | 0.269                 | 0.065                 | 0.009                 |  |
| NCBPS(50)        | 0.438            | 0.420                | 6.37                  | 1.13                    | 0.037                 | 0.184                 | 0.336                 | 0.291                 | 0.120                 | 0.028                 | 6.43                  | 1.00                    | 0.012                 | 0.148                 | 0.397                 | 0.306                 | 0.111                 | 0.023                 |  |
| NCBPS(80)        | 0.348            | 0.419                | 6.61                  | 1.23                    | 0.028                 | 0.152                 | 0.304                 | 0.293                 | 0.157                 | 0.054                 | 6.64                  | 1.07                    | 0.008                 | 0.122                 | 0.345                 | 0.323                 | 0.157                 | 0.039                 |  |
| NCPS[2.11]       | 0.688            |                      | 5.87                  | 0.94                    | 0.054                 | 0.293                 | 0.419                 | 0.190                 | 0.037                 | 0.004                 | 5.96                  | 0.82                    | 0.023                 | 0.256                 | 0.494                 | 0.199                 | 0.027                 | 0.001                 |  |
| NCPS[2.30]       | 0.677            |                      | 5.94                  | 0.96                    | 0.050                 | 0.273                 | 0.406                 | 0.220                 | 0.045                 | 0.003                 | 6.00                  | 0.83                    | 0.018                 | 0.245                 | 0.482                 | 0.219                 | 0.034                 | 0.002                 |  |
| NCPS[2.54]       | 0.625            |                      | 5.84                  | 1.00                    | 0.071                 | 0.299                 | 0.388                 | 0.191                 | 0.043                 | 0.004                 | 5.91                  | 0.83                    | 0.031                 | 0.270                 | 0.482                 | 0.190                 | 0.025                 | 0.001                 |  |
| NCPS[2.74]       | 0.544            |                      | 5.82                  | 1.02                    | 0.079                 | 0.298                 | 0.381                 | 0.187                 | 0.046                 | 0.004                 | 5.85                  | 0.85                    | 0.035                 | 0.306                 | 0.462                 | 0.166                 | 0.028                 | 0.002                 |  |
| NCPS[2.93]       | 0.529            |                      | 5.89                  | 1.05                    | 0.077                 | 0.274                 | 0.377                 | 0.204                 | 0.056                 | 0.006                 | 5.94                  | 0.89                    | 0.034                 | 0.274                 | 0.450                 | 0.204                 | 0.034                 | 0.004                 |  |
| $\sigma^b$       | 0.001            | 0.007                | 0.02                  | 0.02                    | 0.004                 | 0.005                 | 0.008                 | 0.006                 | 0.003                 | 0.003                 | 0.02                  | 0.01                    | 0.003                 | 0.008                 | 0.009                 | 0.006                 | 0.006                 | 0.001                 |  |

<sup>a</sup>Fractional populations  $\{x_M^{[p]}\}$  of  $\{M^{[p]}\}$  coordinations for  $M=\{\text{Na,Ca}\}$ , average coordination number  $\bar{Z}_M = \sum_p p x_M^{[p]}$ , and distribution width  $\sigma_M(p) = \left\{ \sum_p x_M^{[p]} (p - \bar{Z}_M)^2 \right\}^{1/2}$ . The fractional populations obey  $\sum_p x_M^{[p]} = 1$ , but a few structures involve minor  $M^{[3]}$  or  $M^{[10]}$  contributions (not listed).

<sup>b</sup>Typical data uncertainties, estimated as the rms deviation from the average parameter value.

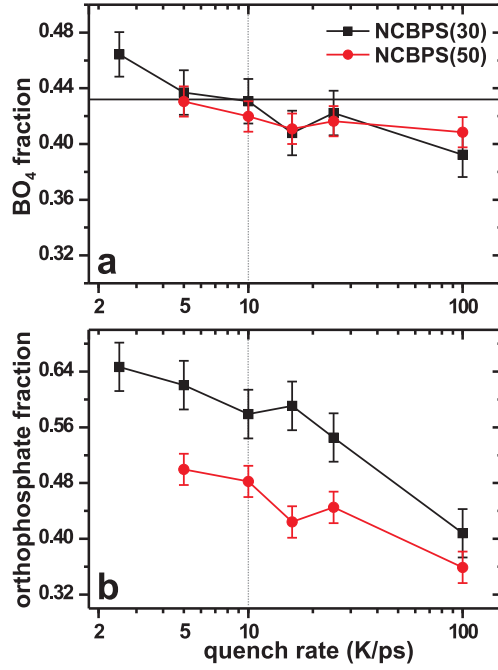

**Fig. S1.** Cooling-rate ( $q$ ) dependence of the MD-generated fractional population of (a)  $\text{BO}_4$  and (b) orthophosphate groups in the NCBPS(30) and NCBPS(50) glasses. The vertical line marks the rate  $q = 10$  K/ps employed in all other simulations. Both glasses reveal very close NMR-derived values  $x_{\text{B}}^{[4]} \approx 0.43$  in (a), marked by the horizontal line. Note that the two NMR-derived orthophosphate fractions,  $x_{\text{P}}^0 = 0.89$  for NCBPS(30) and  $x_{\text{P}}^0 = 0.86$  for NCBPS(50), are outside the vertical plot-range in (b).

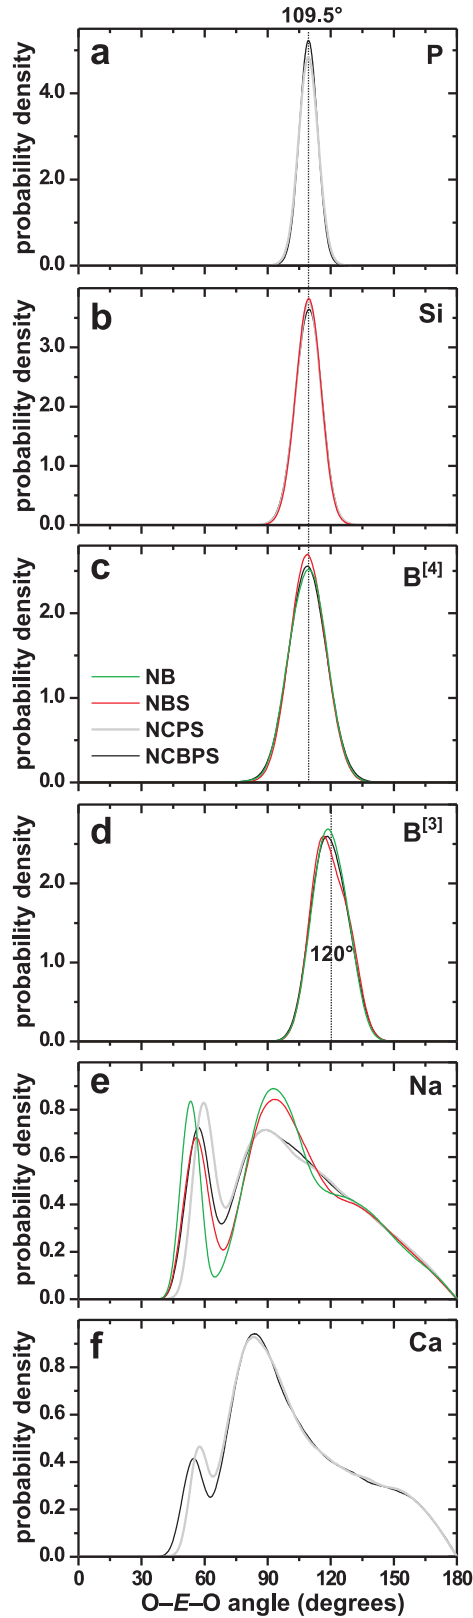

**Fig. S2.** Intrapolyhedral O–E–O bond-angle distribution (BAD) functions observed in models of the NB1.3, NBS2–2.5(33), NCPS[2.93], and NCBPS(30) glasses [see legend in (c)] for the network formers (a) P, (b) Si, (c) B<sup>[4]</sup>, (d) B<sup>[3]</sup>, as well as the network modifiers (e) Na, and (f) Ca. The glasses feature  $x_{\text{NBO}} \approx 0.5$  (see caption to Fig. 5 for further details).



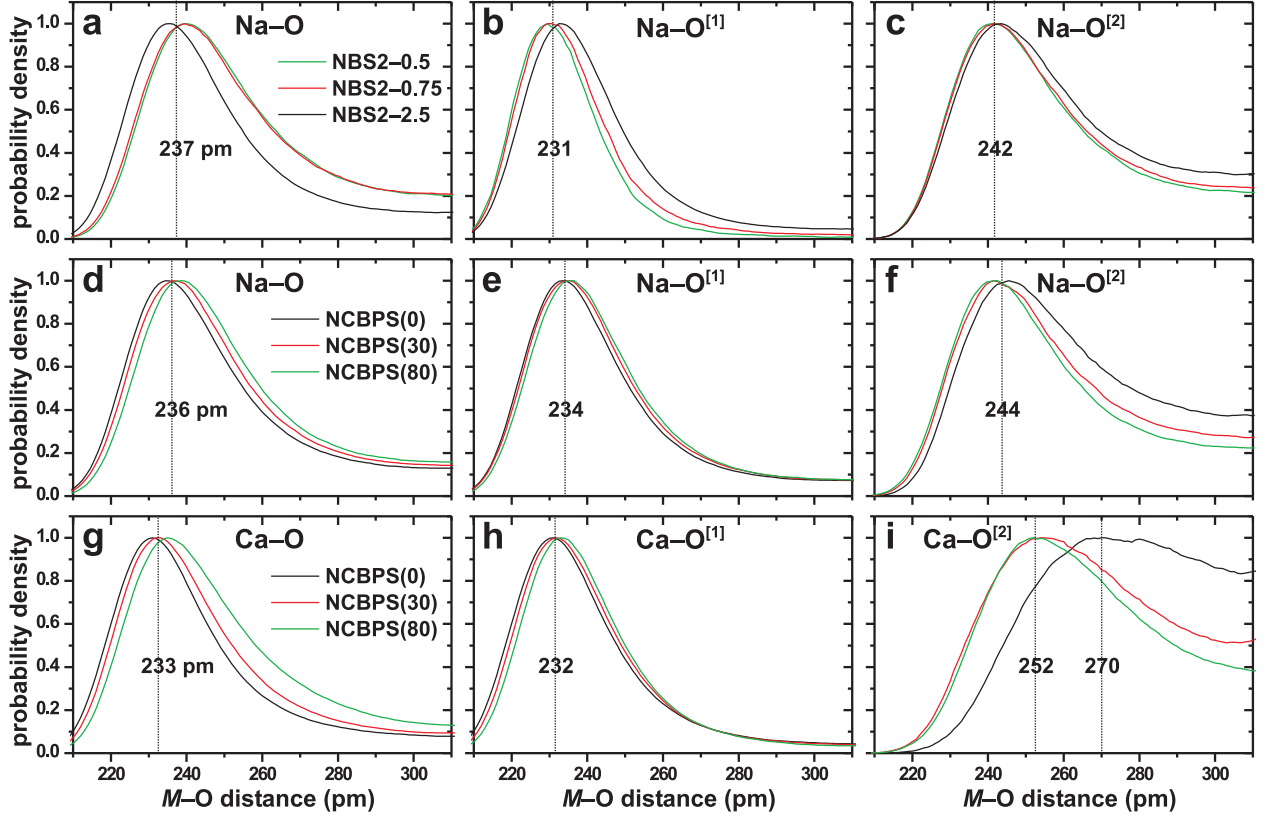

**Fig. S3.** MD-derived  $M$ -O (left panel),  $M$ -O<sup>[1]</sup> (mid panel), and  $M$ -O<sup>[2]</sup> (right panel) pair-distribution functions for (a-f)  $M$ =Na, and (g-i)  $M$ =Ca in glass models of the (a-c) NBS and (d-g) NCBPS systems, as identified by the legends in (a, d, g). Note that the NBO content *increases* together with  $R$  along the NBS2- $R$ (33) series, whereas it *decreases* for increasing amount of B in the NCBPS( $f$ ) glasses (i.e., for increasing  $f$ ). To facilitate comparisons among different O<sup>[1]</sup>/O<sup>[2]</sup> coordinations and glasses with distinct NBO contents, all PDFs are normalized to equal maxima of unity.

## References

- S1 J. D. Gale and A. L. Rohl, *Mol. Simul.*, 2003, **29**, 291–341.
- S2 R. I. Ainsworth, D. Di Tommaso, J. K. Christie, and N. H. de Leeuw, *J. Chem. Phys.*, 2012, **137**, 234502.
- S3 D. Fail and S. Feller, *J. Non-Cryst. Solids*, 1990, **119**, 103–111.
- S4 J. D. Epping, H. Eckert, A. W. Imre, and H. Mehrer, *J. Non-Cryst. Solids*, 2005, **351**, 3521–3529.
- S5 K. Takahashi, A. Osaka, and R. Furuno, *Yogyo Kyokai Shi*, 1983, **91**, 199–205.
- S6 M. Ren, L. Deng, and J. Du, *J. Am. Ceram. Soc.*, 2017, **100**, 2516–2524.
- S7 M. Barlet, A. Kerrache, J.-M. Delaye, and C. L. Rountree, *J. Non-Cryst. Solids*, 2013, **382**, 32–44.
- S8 M. Imaoka, H. Hasegawa, Y. Hamaguchi, and Y. Kurotaki, *Yogyo Kyokai Shi*, 1971, **79**, 36–44.
- S9 W. L. Konijnendijk, *The Structure of Borosilicate Glasses*, Technische Hogeschool Eindhoven, Eindhoven, 1975.
- S10 R. Mathew, B. Stevansson, A. Tilocca, and M. Edén, *J. Phys. Chem. B*, 2014, **118**, 833–844.
- S11 Y. Yu, B. Stevansson, and M. Edén, *J. Phys. Chem. B*, 2017, **121**, 9737–9752.
- S12 R. J. Harrison, A. Putnis, and W. Kockelmann, *Phys. Chem. Chem. Phys.*, 2002, **4**, 3252–3259.
- S13 M. Ben Amara, M. Vlasse, G. Le Flem, and P. Hagemuller, *Acta Cryst.*, 1983, **C39**, 1483–1485.
- S14 J. Bennazha, A. Boukhari, and E. M. Holt, *Solid State Sci.*, 1999, **1**, 373–380.
- S15 D. M. Poojary, R. B. Borade, F. L. Cambell III, and A. Clearfield, *J. Solid State Chem.*, 1994, **112**, 106–112.
- S16 G. E. Gurr, P. W. Montgomery, C. D. Knutson, and B. T. Gorres, *Acta Cryst.*, 1970, **B26**, 906–915.
- S17 M. Marezio, H. A. Plettinger, and W. H. Zachariasen, *Acta Cryst.*, 1963, **16**, 594–595.
- S18 A. Kirfel, *Acta Cryst.*, 1987, **B43**, 333–343.
- S19 W. Schuckmann, *Neues Jahrb. Mineral. Mh.*, 1969, **1969**, 142–143.
- S20 J. Fayos, R. A. Howie, and F. P. Glasser, *Acta Cryst.*, 1985, **C41**, 1396–1398.
- S21 E. V. Sokolova and A. P. Khomyakov, *Dokl. Akad. Nauk SSSR*, 1991, **319**, 879–883.
- S22 M. W. Phillips, G. V. Gibbs, and P. H. Ribbe, *Am. Mineral.*, 1974, **59**, 79–85.
- S23 D.-B. Xiong, H.-H. Chen, X.-X. Yang, and J.-T. Zhao, *J. Solid State Chem.*, 2007, **180**, 233–239.
- S24 R. Kniep, G. Gözel, B. Eisenmann, C. Röhr, M. Asbrand, and M. Kizilyalli, *Angew. Chem. Int. Ed.*, 1994, **33**, 749–751.
